# Supplementary material
Source: publisher site journal article supplement (https://www.dovepress.com/article/457146)
Supplement: Supplementary file 1 [file get_supplementary_file.php]

**Supplementary table 1** Clinical characteristics and nutritional indices of training set and validation set

| Characteristics | ALL(n=524) | Training set （n=255） | Validation set （n=269） | P-value |
| --- | --- | --- | --- | --- |
| Overall survival | 19.68±8.59 | 19.48±8.06 | 19.86±9.08 | 0.616 |
| Mortality | 79（15.08%） | 36（14.12%） | 43（15.99%） | 0.550 |
| Age | 42.66±15.06 | 43.53±15.47 | 41.84±14.64 | 0.200 |
| Gender |  |  |  |  |
| Male | 373（71.18%） | 178（69.80%） | 195（72.49%） |  |
| Female | 151（28.82%） | 77（30.20%） | 74（27.51%） | 0.497 |
| Retreatment | 385（73.47%） | 190（74.51%） | 195（72.49%） | 0.601 |
| Extrapulmonary Tuberculosis | 56（10.69%） | 27（10.59%） | 29（10.78%） | 0.943 |
| Smoking | 205（39.12%） | 98（38.43%） | 107（39.78%） | 0.752 |
| Drinking | 76（14.50%） | 39（15.29%） | 37（13.75%） | 0.617 |
| Co-infection |  |  |  |  |
| Bacterium | 30（5.73%） | 15（5.88%） | 15（5.58%） | 0.880 |
| Fungus | 101（19.27%） | 47（18.43%） | 54（20.07%） | 0.634 |
| HIV | 12（2.29%） | 5（1.96%） | 7（2.60%） | 0.624 |
| Hepatitis B virus | 70（13.36%） | 33（12.94%） | 37（13.75%） | 0.784 |
| Hepatitis C virus | 6（1.15%） | 3（1.18%） | 3（1.12%） | 0.948 |
| Underlying disease |  |  |  |  |
| Diabetes mellitus | 85（16.22%） | 40（15.69%） | 45（16.73%） | 0.746 |
| Hypertension | 26（4.96%） | 15（5.88%） | 11（4.09%） | 0.345 |
| Malignancy | 14（2.67%） | 6（2.35%） | 8（2.97%） | 0.659 |
| Underlying Pulmonary disease |  |  |  |  |
| Pulmonary heart disease | 48（9.16%） | 21（8.24%） | 27（10.04%） | 0.475 |
| Bronchiectasia | 187（35.69%） | 109（42.75%） | 78（29.00%） | 0.001 |
| COPD | 40（7.63%） | 22（8.63%） | 18（6.69%） | 0.404 |
| Pulmonary Imaging |  |  |  |  |
| Destroyed lung | 43（8.21%） | 20（7.84%） | 23（8.55%） | 0.768 |
| Pulmonary cavitation | 334（63.74%） | 174（68.24%） | 160（59.48%） | 0.037 |
| Pleural effusion | 128（24.43%） | 62（24.31%） | 66（24.54%） | 0.953 |
| Nutritional indices |  |  |  |  |
| HALP score | 23.29±16.13 | 23.28±15.51 | 28.46±16.73 | 0.992 |
| PNI | 41.77±7.08 | 41.87±6.91 | 41.68±7.25 | 0.762 |
| CONUT score | 5.74±2.32 | 5.71±2.33 | 5.77±2.32 | 0.768 |

**Abbreviation:** HIV, human immunodeficiency virus; HALP score, hemoglobin-albumin-lymphocyte-platelet score; COPD, chronic obstructive pulmonary disease; PNI, prognostic nutritional index; CONUT score, controlling nutritional status score.

**Supplementary table 2** Accuracy of the cut-off values, sensitivity, specificity, and Youden index of nutritional indices in the training set

| Variables | cut-off values | sensitivity | specificity | Youden index |
| --- | --- | --- | --- | --- |
| HALP score | 16.85 | 0.643 | 0.797 | 0.431 |
| PNI | 38.7 | 0.755 | 0.719 | 0.464 |
| CONUT score | 6.5 | 0.684 | 0.748 | 0.432 |

**Abbreviation:** HALP score, hemoglobin-albumin-lymphocyte-platelet score; PNI, prognostic nutritional index; CONUT score, controlling nutritional status score

**Supplementary table 3** Unadjusted Cox regression analyses for all-cause mortality in training set

| **Characteristics** | Unadjusted HR | 95%CI | P-value |
| --- | --- | --- | --- |
| Age | 1.046 | 1.022-1.071 | 0.000 |
| Gender | 2.725 | 1.057-7.023 | 0.038 |
| Retreatment | 1.455 | 0.637-3.323 | 0.373 |
| Extrapulmonary Tuberculosis | 1.863 | 0.774-4.482 | 0.165 |
| Smoking | 1.881 | 0.975-3.628 | 0.059 |
| Drinking | 2.882 | 1.417-5.861 | 0.003 |
| **Co-infection** |  |  |  |
| Bacterium | 4.194 | 1.736-10.13 | 0.001 |
| Fungus | 3.224 | 1.649-6.306 | 0.001 |
| HIV | 1.407 | 0.193-10.282 | 0.736 |
| Hepatitis B virus | 1.804 | 0.813-4.006 | 0.147 |
| Hepatitis C virus | 0.049 | 0-17751.926 | 0.644 |
| **Underlying disease** |  |  |  |
| Diabetes mellitus | 1.154 | 0.479-2.78 | 0.75 |
| Hypertension | 2.013 | 0.708-5.719 | 0.189 |
| Malignancy | 5.551 | 1.691-18.222 | 0.005 |
| **Underlying Pulmonary disease** |  |  |  |
| Pulmonary heart disease | 5.092 | 2.383-10.884 | 0.000 |
| Bronchiectasia | 2.181 | 1.120-4.246 | 0.022 |
| COPD | 4.725 | 2.212-10.094 | 0.000 |
| **Pulmonary Imaging** |  |  |  |
| Destroyed lung | 3.469 | 1.495-8.048 | 0.004 |
| Pulmonary cavitation | 1.67 | 0.761-3.668 | 0.201 |
| Pleural effusion | 2.055 | 1.035-4.081 | 0.040 |

**Abbreviation:** CI, Confidence interval; HIV, human immunodeficiency virus; HALP score, hemoglobin-albumin-lymphocyte-platelet score; COPD, chronic obstructive pulmonary disease; PNI, prognostic nutritional index; CONUT score, controlling nutritional status score.

**Supplementary table 4** Comparison of the AUC between indices in training set and validation set

| Paired indices | Training set | | Validation set | |
| --- | --- | --- | --- | --- |
| AUC difference | P-value | AUC difference | P-value |
| Combination-ALB | 0.063 | 0.068 | 0.073 | 0.002 |
| Combination-Lymphocyt count | 0.110 | 0.003 | 0.065 | 0.107 |
| Combination-HGB | 0.123 | 0.008 | 0.091 | 0.015 |

**Abbreviation:** HGB, hemoglobin; ALB, albumin.
